# Supplementary material for: Tuning the vertical location of helical surface states in topological insulator heterostructures via dual-proximity effects
Source: PubMed Central journal article supplement — Sci Rep. 2013 Feb 6;3:1233. doi: 10.1038/srep01233 (PMC3565165; doi:10.1038/srep01233), 2013-02-06
Supplement: srep01233-s1.pdf [file srep01233-s1.pdf]

**Supplementary Information for:**  
**Tuning the vertical location of helical surface states in topological  
insulator heterostructures via dual-proximity effects**

Guangfen Wu<sup>1,2</sup>, Hua Chen<sup>3,4</sup>, Yan Sun<sup>5</sup>, Xiaoguang Li<sup>6,3,1</sup>, Ping Cui<sup>1,3</sup>, Cesare  
Franchini<sup>5</sup>, Jinlan Wang<sup>2</sup>, Xing-Qiu Chen<sup>5</sup>, and Zhenyu Zhang<sup>1,7,4</sup>

<sup>1</sup>*ICQD, Hefei National Laboratory for Physical Sciences at the Microscale,  
University of Science and Technology of China, Hefei, Anhui, 230026, China*

<sup>2</sup>*Department of Physics, Southeast University, Nanjing, 211189, China*

<sup>3</sup>*Department of Physics and Astronomy, University of Tennessee, Knoxville, TN  
37996, USA*

<sup>4</sup>*Department of Physics, University of Texas, Austin, TX 78712, USA*

<sup>5</sup>*Shenyang National Laboratory for Materials Science, Institute of Metal Research,  
Chinese Academy of Sciences, Shenyang, 110016, China*

<sup>6</sup>*State Key Laboratory of Surface Physics and Department of Physics, Fudan  
University, Shanghai, 200433, China*

<sup>7</sup>*School of Applied Science and Engineering, Harvard University, Cambridge, MA  
02138, USA*

## S1. Key properties of the ZnM ( $M = \text{S, Se, Te}$ ) conventional insulators (CIs)

In this section we give a systematic comparison of the band gap, the spin-orbit coupling (SOC) strength, and the work function of ZnM under different conditions (strain and dimensionality).

For bulk semiconductors, the SOC strength is defined as  $\Delta_{SO} = \varepsilon(\Gamma_{8v}) - \varepsilon(\Gamma_{7v})$  at the top of the valence band, according to Ref. 1 (see Supplementary Fig. 1a for the case of bulk ZnTe). For the single-layered ZnM films, we use the magnitude of the SOC-split gaps in the valence band as a measure of the SOC, as shown in Supplementary Figs. 1b-f. In Supplementary Fig. 2 we also show the strength of SOC defined in an alternative way: the difference in band gap with and without SOC,  $\Delta'_{SO} = V_g(\text{noSOC}) - V_g(\text{SOC})$ . Both definitions give the same trend for the bulk ZnM, i.e., SOC is increasing in the sequence of ZnS-ZnSe-ZnTe, agreeing well with experiments<sup>2</sup> as depicted in the left panel of Supplementary Fig. 2. For the single-layered ZnM under different strains due to epitaxy on the TI substrates (see Table I in the main text), the overall trend of the SOC is the same as that in the bulk, but with reduced magnitudes (right panel of Supplementary Fig. 2).

The band gaps of bulk ZnM are smaller by about 50% compared with the experimental values<sup>2</sup> due to the fact that the generalized gradient approximation usually underestimates band gaps. However, the trend that the band gap is decreasing in the sequence of ZnS-ZnSe-ZnTe is correctly reproduced by our calculations, as shown in the left panel of Supplementary Fig. 2. In the right panel of Supplementary Fig. 2 we show the band gaps for the single-layered ZnM. In particular, we calculated the band gaps of single-layered ZnTe with compressive (-3.9%), zero, and tensile

strains (+1.6%), and the trend suggests that the band gap will decrease as the strain goes from compressive to tensile. As a final note, the work function of the single-layered ZnTe film also sensitively depends on strain (Table I in the main text), which increases as the strain goes from compressive to tensile.

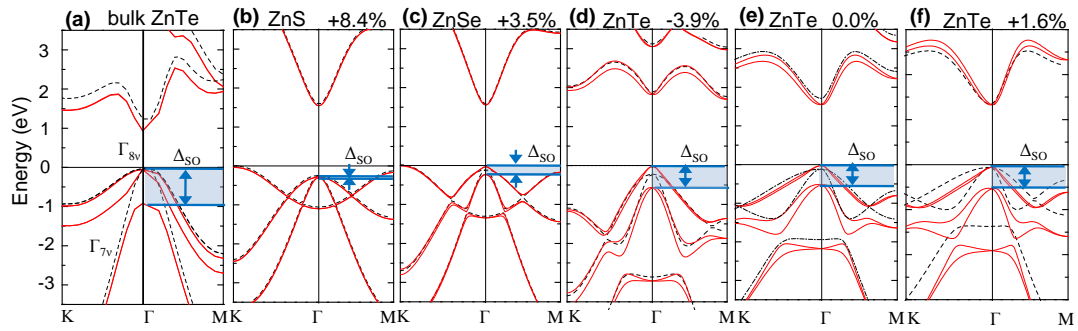

**Supplementary Figure 1 | Band structures and SOC-induced gaps of bulk ZnTe and differently strained single-layered ZnM ( $M = \text{S, Se, Te}$ ).** **a**, Bulk ZnTe. **b**, ZnS with a tensile strain of +8.4%. **c**, ZnSe with a tensile strain of +3.5%. **d-f**, ZnTe with strain of -3.9%, 0.0%, and +1.6%, respectively. The red solid and black dashed curves correspond to the band structure with and without SOC, respectively.

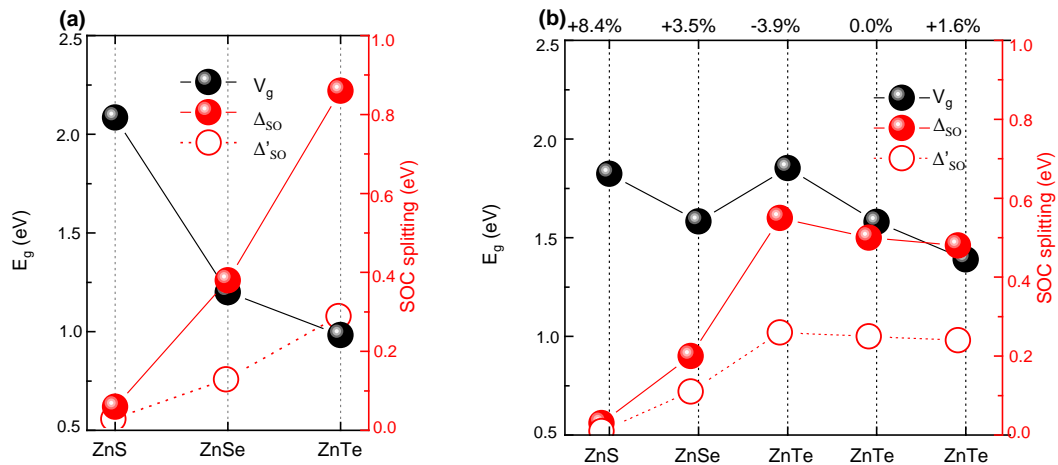

**Supplementary Figure 2 | Band gap and SOC splitting of ZnM ( $M = S, Se, Te$ ).** **a**, bulk ZnM. **b**, single-layered ZnM ( $M = S, Se, Te$ ) with different strains: +8.4% for ZnS, +3.5% for ZnSe, -3.9%, 0.0%, and +1.6% for ZnTe.

## S2. Band structures of the $Bi_2Se_3$ and $Bi_2Te_3$ substrates.

The inclusion of SOC in our calculations closes the band gap through introducing a single Dirac-cone at the  $\Gamma$  point, which is the topological surface state (TSS), for both the 6QL  $Bi_2Se_3$  and 6QL  $Bi_2Te_3$  slabs<sup>3</sup>, as shown in Supplementary Fig. 3. For the corresponding 1QL slabs, the energy gaps persist, despite significantly reduced, after the inclusion of the SOC, which is due to the coupling of the TSSs from the two surfaces.

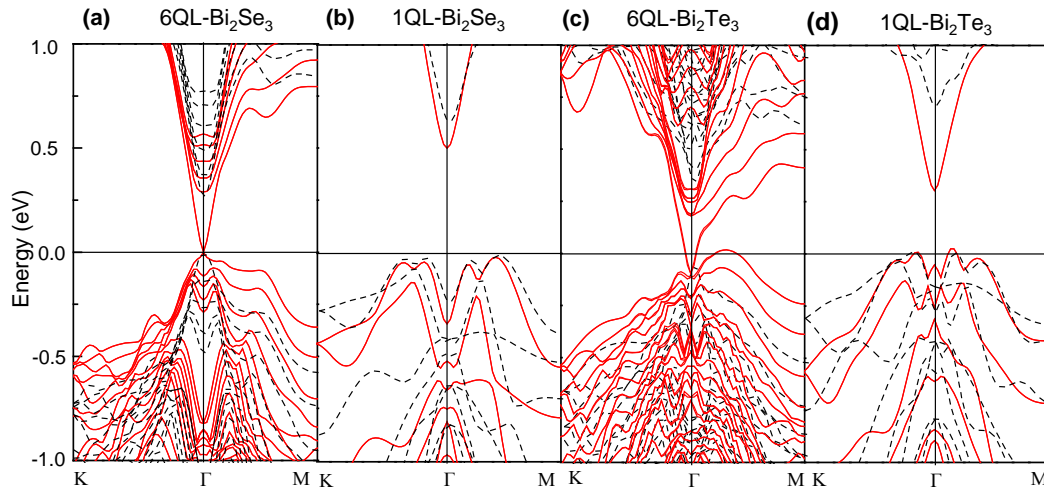

**Supplementary Figure 3 | Band structures of  $\text{Bi}_2\text{Se}_3$  and  $\text{Bi}_2\text{Te}_3$ .** **a**, 6QL- $\text{Bi}_2\text{Se}_3$ . **b**, 1QL- $\text{Bi}_2\text{Se}_3$ . **c**, 6QL- $\text{Bi}_2\text{Te}_3$ . **d**, 1QL- $\text{Bi}_2\text{Te}_3$ . The red solid and black dashed curves correspond to band structures with and without SOC, respectively.

### **S3. Band structures of the $\text{Bi}_2\text{Se}_3$ substrate and the $\text{ZnSe}/\text{Bi}_2\text{Se}_3$ heterostructure with varied SOC strengths.**

To see the correlation between the SOC strength and the topological properties of the systems, we have tuned the SOC strength,  $\lambda_{\text{SO}}$ , in both the  $\text{Bi}_2\text{Se}_3$  substrate and  $\text{ZnSe}/\text{Bi}_2\text{Se}_3$  heterostructure. Here  $\lambda_{\text{SO}}$  is the term used in the Hamiltonian of the system from the contribution of the SOC, while  $\Delta_{\text{SO}}$  defined in the main manuscript is the SOC-split gap in the valence band as a measure of the SOC effect. For  $\text{Bi}_2\text{Se}_3$ , the use of substantially smaller values of  $\lambda_{\text{SO}}$  than that in the actual material system would fail to close the bulk band gap, thereby giving no TSS (Supplementary Figs. 4a-b), while the use of a too strong SOC would severely distort the bulk valence bands, thereby destroying the TSS as well (Supplementary Fig. 4d). For  $\text{ZnSe}/\text{Bi}_2\text{Se}_3$ , as we

reduce the  $\lambda_{\text{SO}}$  of the entire system, TSS will again disappear, as it depends on the bulk topology (Supplementary Fig. 5).

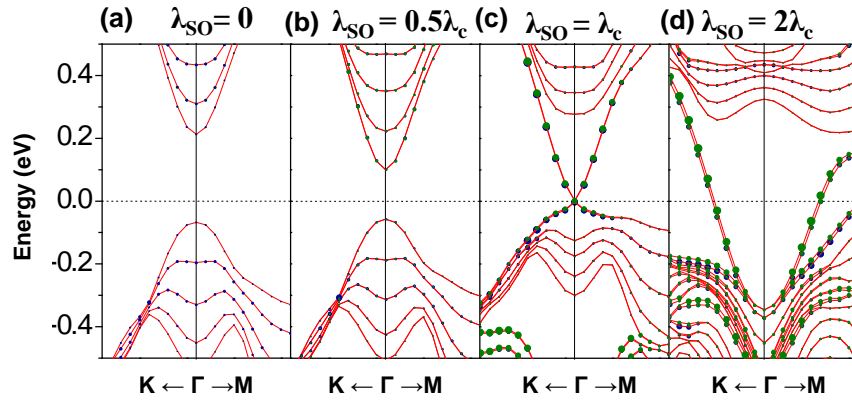

**Supplementary Figure 4 | Band structures of  $\text{Bi}_2\text{Se}_3$  with different SOC strengths ( $\lambda_{\text{SO}}$ ) along the  $\text{K} \leftarrow \Gamma \rightarrow \text{M}$  direction.** The green and blue dots indicate the electronic bands contributed by the 1<sup>st</sup> and 6<sup>th</sup> QL of the  $\text{Bi}_2\text{Se}_3$ , respectively; the size of the dots indicates different spectral weights.  $\lambda_{\text{SO}}$  is the SOC strength we exploited, while  $\lambda_c$  is the SOC strength in the actual physical systems.

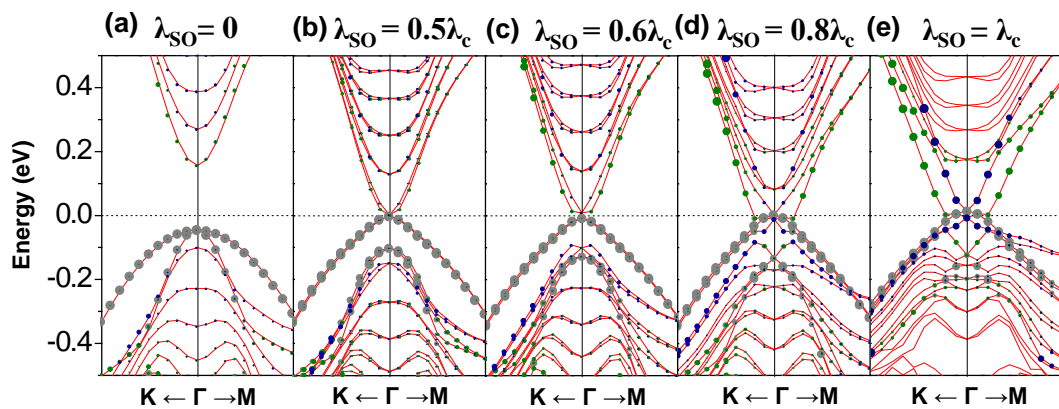

**Supplementary Figure 5 | Band structures of  $\text{ZnSe}/\text{Bi}_2\text{Se}_3$  with different SOC strengths ( $\lambda_{\text{SO}}$ ) along the  $\text{K} \leftarrow \Gamma \rightarrow \text{M}$  direction.** The grey, green and blue dots

indicate the electronic bands contributed by the ZnSe overlayer, the 1<sup>st</sup> and 6<sup>th</sup> QL of the Bi<sub>2</sub>Se<sub>3</sub>, respectively. All other symbols are the same as in Supplementary Fig. 4.

## References

1. Cardona, M. *in Solid State Physics*, edited by Seitz, F., Turnbull, D., & Ehrenreich, E. (Academic, New York, 1969), Vol. 11.
2. Adachi, S. *Properties of Group-IV, III-V and II-VI Semiconductors* (John Wiley & Sons Ltd, Chichester, 2005).
3. Zhang, H. *et al.* Topological insulators in Bi<sub>2</sub>Se<sub>3</sub>, Bi<sub>2</sub>Te<sub>3</sub> and Sb<sub>2</sub>Te<sub>3</sub> with a single Dirac cone on the surface. *Nature Phys.* **5**, 438-442 (2009).
